# Supplementary material for: Quantifying effects of second-sphere cationic groups on redox properties of dimolybdenum quadruple bonds
Source: Royal Society of Chemistry journal article supplement (doi:10.1039/d4cc02759k), 2024-01-01
Supplement: d4cc02759k1.xlsx [file d4cc02759k1.xlsx]

## Sheet: cis-DMG2
100
Mo2C38N6H46O8
Mo	-1.01774	0.120806	-0.741724
Mo	1.03294	-0.162658	-0.680671
O	-1.15327	-0.802516	-2.66745
O	-0.797384	1.95999	-1.81681
O	1.03731	-1.09195	-2.60258
O	1.39116	1.65223	-1.74588
N	-1.02436	1.25764	1.05241
O	-5.61513	3.84393	2.84483
N	0.841396	-2.06386	0.256404
N	-1.40742	-1.74001	0.203073
O	-6.63717	-3.19062	1.41707
C	0.381706	2.31882	-2.09542
C	-0.073526	-1.1738	-3.19942
N	1.23298	0.953123	1.12322
C	-2.1759	1.90683	1.53235
C	-0.083478	-1.77378	-4.58356
O	6.29537	2.10036	3.12816
C	0.547225	3.57061	-2.92045
C	-2.16937	3.24611	1.93644
O	5.36739	-4.89955	1.80889
C	-0.37517	-2.49875	0.525703
C	1.95777	-2.83149	0.627727
C	-4.53292	3.15958	2.40863
C	-3.38558	1.22114	1.56484
C	0.140951	1.50275	1.6249
C	-4.55659	1.83153	1.99384
C	-2.70316	-2.1728	0.535527
C	-5.04676	-2.30844	-0.047506
C	2.48539	1.28982	1.66556
C	2.02947	-3.51772	1.84398
C	-3.74917	-1.96155	-0.366878
C	-5.33933	-2.88652	1.18793
C	3.07423	-2.85518	-0.203382
C	4.23243	-3.5328	0.154041
C	-3.3272	3.85976	2.375
C	2.79341	2.5715	2.11523
C	-6.85266	3.16196	2.86956
C	-3.00627	-2.74424	1.76769
C	4.2882	-4.21529	1.36543
C	-4.30747	-3.10646	2.09512
C	4.05234	2.87764	2.61843
C	3.49106	0.320298	1.71155
C	4.7476	0.616829	2.19999
C	5.04034	1.89915	2.66468
C	-6.96237	-3.7766	2.6613
C	6.61599	3.39	3.60843
C	6.52145	-4.90008	0.993343
C	3.17339	-4.20392	2.20356
H	-0.349165	-2.83126	-4.46972
H	-1.25089	3.82003	1.88573
H	-0.529123	-3.47869	0.978636
H	-3.41147	0.182211	1.25828
H	0.197999	2.13701	2.50987
H	-5.47473	1.25875	2.00615
H	-5.85238	-2.14082	-0.753664
H	1.19002	-3.48851	2.52941
H	-3.53073	-1.51953	-1.33336
H	3.03599	-2.32893	-1.15145
H	5.07914	-3.52268	-0.519669
H	-3.3161	4.89989	2.68175
H	2.04964	3.35793	2.05496
H	-7.14769	2.83125	1.86834
H	-7.58587	3.87658	3.24139
H	-6.82035	2.2974	3.54046
H	-2.22024	-2.88468	2.50125
H	-4.50378	-3.54105	3.06661
H	4.25295	3.88701	2.95343
H	3.27169	-0.682965	1.36405
H	5.51868	-0.14512	2.23427
H	-6.44765	-4.73292	2.80038
H	-8.03791	-3.94789	2.64454
H	-6.71703	-3.10975	3.49427
H	7.65318	3.34276	3.93772
H	6.52234	4.14537	2.8214
H	5.9816	3.6709	4.45554
H	7.27	-5.48494	1.52633
H	6.90126	-3.88503	0.837719
H	6.32571	-5.36569	0.021951
H	3.22618	-4.72515	3.15314
H	0.947911	-1.73908	-4.97148
H	-0.316605	4.22406	-2.71162
H	0.461282	3.26214	-3.96934
N	1.80873	4.24346	-2.73356
C	1.99346	5.26789	-3.73812
H	2.96903	5.74123	-3.60489
H	1.9588	4.82318	-4.7356
H	1.2229	6.05783	-3.68793
C	1.91207	4.80171	-1.40192
H	1.13638	5.56369	-1.20663
H	1.8133	4.01317	-0.653671
H	2.88991	5.27111	-1.27323
C	-1.13979	-1.90134	-6.70759
H	-1.88441	-1.43575	-7.35742
H	-0.186591	-1.95095	-7.2636
H	-1.4602	-2.9234	-6.49155
C	-0.662085	0.226532	-5.74233
H	-0.62787	0.79466	-4.80984
H	0.32387	0.310447	-6.23322
H	-1.4072	0.688358	-6.39376
N	-1.02913	-1.14857	-5.47732

## Sheet: cis-TMG2
108
Mo2C40N6H52O8
Mo	0.945573	-0.25575	0.724724
Mo	-1.08435	0.133191	0.551995
O	0.616807	-1.59032	2.37955
O	1.17625	1.32929	2.17068
O	-1.54881	-1.16555	2.20181
O	-0.989489	1.74296	1.98112
N	1.46274	1.16529	-0.76352
O	6.72	2.55218	-1.95094
N	-1.38223	-1.49372	-0.773682
N	0.844067	-1.90841	-0.595578
O	5.52812	-4.5736	-1.95955
C	0.148392	1.99554	2.45045
C	-0.575202	-1.7488	2.74491
N	-0.766572	1.59496	-0.940729
C	2.78974	1.51602	-1.07793
C	-0.787522	-2.66304	3.9268
O	-5.0717	4.64139	-2.7067
C	0.219163	3.15176	3.41903
C	3.2007	2.84797	-1.1971
O	-6.39913	-2.52618	-2.94391
C	-0.334052	-2.22834	-1.09741
C	-2.64375	-1.79909	-1.3153
C	5.46104	2.15119	-1.66602
C	3.7453	0.519571	-1.24182
C	0.4765	1.87143	-1.28792
C	5.06914	0.822666	-1.53089
C	1.98417	-2.63651	-0.979978
C	4.14712	-3.54032	-0.386111
C	-1.81319	2.40874	-1.41288
C	-2.81344	-2.21133	-2.6404
C	2.97881	-2.89513	-0.03314
C	4.35491	-3.95371	-1.7023
C	-3.78154	-1.62424	-0.53325
C	-5.05399	-1.85339	-1.03961
C	4.51319	3.15998	-1.49376
C	-1.70068	3.79233	-1.51499
C	7.70117	1.55048	-2.12975
C	2.20357	-3.04567	-2.29157
C	-5.208	-2.27497	-2.35668
C	3.37145	-3.70476	-2.6548
C	-2.76546	4.57123	-1.95275
C	-3.03659	1.82129	-1.7425
C	-4.10356	2.58661	-2.16734
C	-3.97731	3.97133	-2.28165
C	5.76732	-4.99929	-3.28638
C	-4.97138	6.04505	-2.83849
C	-7.56414	-2.33416	-2.1668
C	-4.07441	-2.45191	-3.15025
H	-0.82439	-2.06886	4.84269
H	2.48847	3.64984	-1.03826
H	-0.444408	-3.10095	-1.74119
H	3.44497	-0.517983	-1.15424
H	0.684474	2.66327	-2.00736
H	5.77854	0.0151	-1.65724
H	4.91529	-3.73554	0.353749
H	-1.94994	-2.31927	-3.2869
H	2.82519	-2.58151	0.99423
H	-3.67347	-1.30558	0.49794
H	-5.91199	-1.7048	-0.397272
H	4.82625	4.19447	-1.58258
H	-0.775107	4.28029	-1.23039
H	7.83179	0.951609	-1.22262
H	8.63093	2.07255	-2.35187
H	7.45054	0.89012	-2.96602
H	1.46684	-2.82256	-3.05484
H	3.5094	-3.99904	-3.68692
H	-2.64166	5.64449	-2.01605
H	-3.14076	0.744754	-1.6686
H	-5.04843	2.12024	-2.42393
H	5.01936	-5.72872	-3.61344
H	6.74945	-5.47007	-3.28148
H	5.77633	-4.15376	-3.98179
H	-5.94103	6.38608	-3.1988
H	-4.75631	6.52324	-1.8773
H	-4.19915	6.32478	-3.56228
H	-8.40513	-2.57953	-2.81387
H	-7.65579	-1.295	-1.83447
H	-7.57626	-2.9951	-1.29415
H	-4.19962	-2.76415	-4.18114
H	0.05655	-3.34672	3.98683
H	0.021924	2.78825	4.43031
H	-0.554898	3.86829	3.15148
N	-2.02654	-3.49949	3.89121
N	1.5145	3.8975	3.45925
C	1.28746	5.12978	4.26278
H	2.23144	5.66608	4.33518
H	0.541251	5.74172	3.75982
H	0.938173	4.83954	5.25182
C	2.58888	3.10347	4.11525
H	2.2642	2.85973	5.12547
H	2.76308	2.20053	3.53938
H	3.48558	3.71901	4.14623
C	1.93964	4.29319	2.08934
H	1.11501	4.81818	1.60982
H	2.80273	4.9491	2.182
H	2.20514	3.4013	1.53011
C	-3.25138	-2.68784	4.127
H	-3.34971	-1.95766	3.33054
H	-4.10268	-3.3657	4.13607
H	-3.1508	-2.1919	5.09082
C	-2.13615	-4.21871	2.59423
H	-1.2118	-4.76858	2.42514
H	-2.97826	-4.90471	2.65905
H	-2.30335	-3.49677	1.79905
C	-1.90983	-4.5001	4.98758
H	-2.82159	-5.09332	5.00443
H	-1.04746	-5.13411	4.79143
H	-1.7848	-3.96741	5.92857

## Sheet: DMG3
81
Mo2C27N5H39O8
Mo	0.312027	-1.26874	0.242588
Mo	-1.34211	-0.039894	0.152122
O	0.020066	-1.93584	-1.73428
O	-0.847334	-2.92322	0.919407
O	-1.74028	-0.608207	-1.84152
O	-2.61754	-1.60255	0.814813
N	-0.194083	1.63549	-0.477609
N	1.61387	0.262256	-0.397992
O	7.06661	-0.780349	-0.731457
C	-2.08885	-2.72252	1.05631
C	-0.957161	-1.45118	-2.36665
C	-1.24459	-1.89795	-3.77589
C	-2.93586	-3.88548	1.53455
O	-2.42547	6.69764	-1.0751
C	1.10678	1.46044	-0.624328
C	-0.74434	2.91805	-0.64362
C	-0.127927	0.051409	2.80226
C	3.00375	0.065222	-0.488897
C	4.84086	-1.39214	-1.08055
C	-0.070776	4.08292	-0.260852
C	3.48598	-1.13745	-1.01272
C	5.76053	-0.445696	-0.628045
C	-2.02796	3.04713	-1.16481
C	-2.62699	4.29019	-1.32224
C	3.92825	0.998687	-0.029863
C	-1.93659	5.44221	-0.957703
C	5.29473	0.755414	-0.102384
C	8.0217	0.154139	-0.271084
C	-3.72458	6.84676	-1.61079
C	-0.654064	5.32432	-0.423045
H	-1.82723	-1.10019	-4.26609
H	1.74831	2.27911	-0.949457
H	5.20667	-2.32685	-1.49076
H	0.913493	4.01605	0.188314
H	2.77997	-1.87478	-1.38059
H	-2.56793	2.15574	-1.46637
H	-3.62566	4.34611	-1.73521
H	3.58266	1.92535	0.414333
H	5.98257	1.50293	0.270733
H	7.95955	1.09639	-0.825037
H	8.99706	-0.299052	-0.44352
H	7.90221	0.354657	0.798578
H	-3.92706	7.91696	-1.6223
H	-4.4739	6.34523	-0.989738
H	-3.78306	6.45807	-2.63269
H	-0.127205	6.22268	-0.120672
H	-1.90297	-2.77171	-3.70167
H	-2.5996	-4.11519	2.55216
H	-2.65691	-4.74607	0.917477
C	0.034964	0.42643	4.25222
H	-0.559898	-0.291711	4.82905
H	-0.433085	1.41476	4.39548
O	-1.10153	0.55514	2.17172
O	0.66692	-0.766184	2.26448
N	1.39865	0.385071	4.71872
N	-0.065257	-2.26243	-4.52222
N	-4.36481	-3.73977	1.53006
C	-4.94064	-3.57194	0.215589
H	-6.02661	-3.68423	0.278588
H	-4.7264	-2.59179	-0.237015
H	-4.55869	-4.34684	-0.454528
C	-4.88571	-2.8054	2.50188
H	-5.96885	-2.93513	2.58201
H	-4.44708	-3.0131	3.48143
H	-4.68622	-1.75282	2.25327
C	1.44795	0.505524	6.15953
H	0.875743	-0.302786	6.62116
H	2.48386	0.432412	6.49854
H	1.03888	1.46565	6.5213
C	2.20037	1.41054	4.08534
H	2.19141	1.28119	3.00111
H	1.83698	2.42793	4.31522
H	3.23474	1.33309	4.42734
C	-0.429419	-2.90162	-5.76791
H	0.473864	-3.20355	-6.30298
H	-1.02738	-3.79402	-5.56819
H	-1.01256	-2.2391	-6.432
C	0.780292	-1.11123	-4.75966
H	0.273251	-0.336645	-5.36194
H	1.08412	-0.661891	-3.81172
H	1.68207	-1.42052	-5.29251

## Sheet: TMG3
93
Mo2C30N5H48O8
Mo	-0.606187	-0.883668	-0.729691
Mo	0.910871	-0.149276	0.468535
O	-1.30879	-2.14882	0.818936
O	0.621715	-2.52444	-1.39694
O	0.312985	-1.36659	2.09807
O	2.2422	-1.72604	-0.119977
N	-0.230389	1.50216	1.07472
N	-1.90735	0.681628	-0.214397
O	-6.97035	0.914138	-2.50297
C	1.79356	-2.56299	-0.944117
C	-0.673598	-2.12304	1.90442
C	-1.02687	-3.03099	3.05249
C	2.63279	-3.70351	-1.46119
O	2.08382	5.60827	4.02517
C	-1.45363	1.62449	0.591863
C	0.324086	2.54301	1.84665
C	1.13199	0.911649	-2.23005
C	-3.19259	0.801822	-0.780657
C	-5.21523	-0.282795	-1.53926
C	0.127952	3.88895	1.52568
C	-3.96374	-0.348915	-0.961458
C	-5.73744	0.94319	-1.95259
C	1.1439	2.23477	2.92671
C	1.75197	3.23015	3.67947
C	-3.71305	2.01784	-1.21149
C	1.53944	4.56783	3.3582
C	-4.97587	2.09619	-1.78541
C	-7.52868	2.1406	-2.93175
C	2.93199	5.31637	5.1185
C	0.72069	4.88643	2.2745
H	-0.940685	-2.4592	3.97598
H	-2.07857	2.47315	0.866336
H	-5.80999	-1.17961	-1.67156
H	-0.47716	4.15528	0.666353
H	-3.57626	-1.30621	-0.628699
H	1.30348	1.19415	3.19013
H	2.38091	2.95171	4.51451
H	-3.12233	2.9221	-1.11973
H	-5.34555	3.05969	-2.11096
H	-7.63995	2.84201	-2.09872
H	-8.5125	1.90168	-3.33315
H	-6.92172	2.60329	-3.7165
H	3.26269	6.27739	5.50986
H	3.80492	4.73584	4.80312
H	2.39866	4.7716	5.90397
H	0.570322	5.92952	2.01919
H	-0.302496	-3.8486	3.08685
H	2.59932	-3.68212	-2.5512
H	2.18153	-4.63931	-1.12654
N	-2.38627	-3.64583	3.03824
N	4.06999	-3.74007	-1.06691
C	1.62103	1.64493	-3.45091
H	0.80798	2.27305	-3.81802
H	1.856	0.909875	-4.22242
N	2.81718	2.52026	-3.29515
O	1.71698	0.99829	-1.11955
O	0.104055	0.20939	-2.40968
C	4.66799	-4.92851	-1.73675
H	4.5631	-4.80838	-2.81319
H	5.71881	-4.98018	-1.46091
H	4.14135	-5.81912	-1.39895
C	4.23258	-3.90127	0.403968
H	3.83388	-3.02521	0.904847
H	3.69549	-4.79773	0.709189
H	5.29546	-4.0089	0.611147
C	4.78899	-2.5247	-1.53719
H	5.84569	-2.65361	-1.31163
H	4.63953	-2.43547	-2.61197
H	4.3949	-1.65518	-1.02046
C	-3.44432	-2.60251	2.95933
H	-3.3799	-2.09882	1.99925
H	-4.40816	-3.09645	3.06201
H	-3.29262	-1.89725	3.77444
C	-2.54194	-4.62018	1.92324
H	-1.75467	-5.36668	2.01151
H	-3.51911	-5.08757	2.02637
H	-2.46829	-4.09443	0.977262
C	-2.54119	-4.3838	4.32324
H	-2.45354	-3.67632	5.14578
H	-3.52339	-4.85142	4.32709
H	-1.75996	-5.13925	4.38443
C	2.5636	3.61829	-2.32229
H	2.41625	3.19442	-1.33407
H	3.43079	4.27541	-2.32879
H	1.67598	4.16018	-2.64424
C	3.08095	3.12785	-4.62952
H	3.949	3.77702	-4.53943
H	3.27466	2.32888	-5.34271
H	2.20666	3.70312	-4.92909
C	4.01803	1.73926	-2.89078
H	3.86187	1.33466	-1.89602
H	4.16617	0.939121	-3.61377
H	4.87134	2.41456	-2.89556
